# Supplementary material for: Eicosyl ammoniums elicited thermal reduction alleyway towards gold nanoparticles and their chemo-sensor aptitude
Source: Royal Society of Chemistry journal article supplement (doi:10.1039/c5an02061a), 2016-01-01
Supplement: c5an02061a1.pdf [file c5an02061a1.pdf]

## Electronic supplementary information

### Eicosyl ammoniums elicited thermal reduction alleyway towards gold nanoparticles and their chemo-sensor aptitude

Dolly Rana<sup>a</sup>, Deepika Jamwal<sup>a</sup>, Akash Katoch<sup>b</sup>, Pankaj Thakur<sup>a,c\*</sup>, Susheel Kalia<sup>d</sup>

<sup>a</sup> School of Chemistry, Faculty of Basic Sciences, Shoolini University, Solan (HP)-173212, India.

<sup>b</sup> Institute Instrumentation Centre, Indian Institute of Technology Roorkee, Roorkee - 247667, India.

<sup>c</sup> Istituto Italiano Di Tecnologia (Centre for Advanced Biomaterials for Healthcare) Naples 80125, Italy.

<sup>d</sup> Department of Chemistry, Army Cadet College Wing, Indian Military Academy, Dehradun -248007 (UK) India

\*Corresponding author: [Pankaj.thakur@iit.it](mailto:Pankaj.thakur@iit.it), [chempank@gmail.com](mailto:chempank@gmail.com)

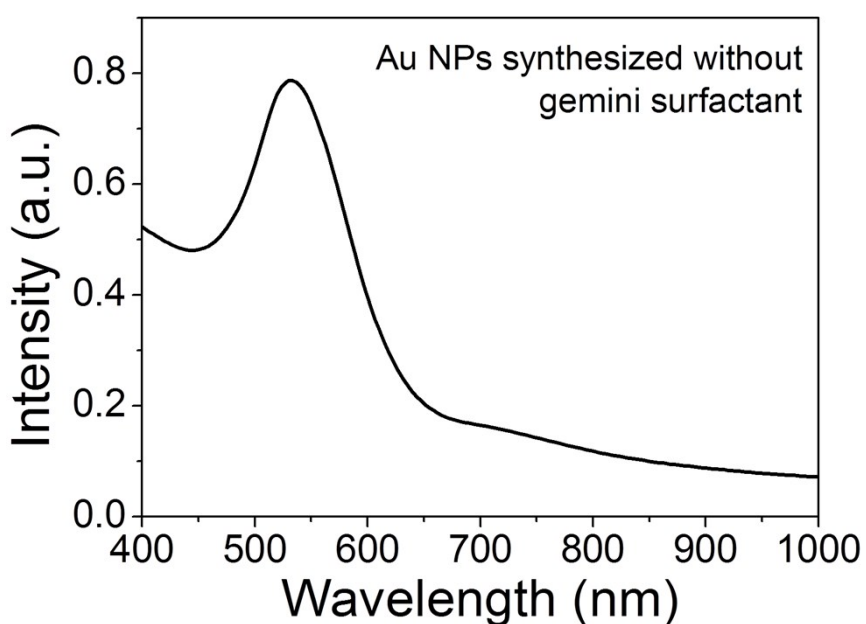

**Fig. S1** UV-Vis absorption spectra of Au NPs synthesized without TTS.

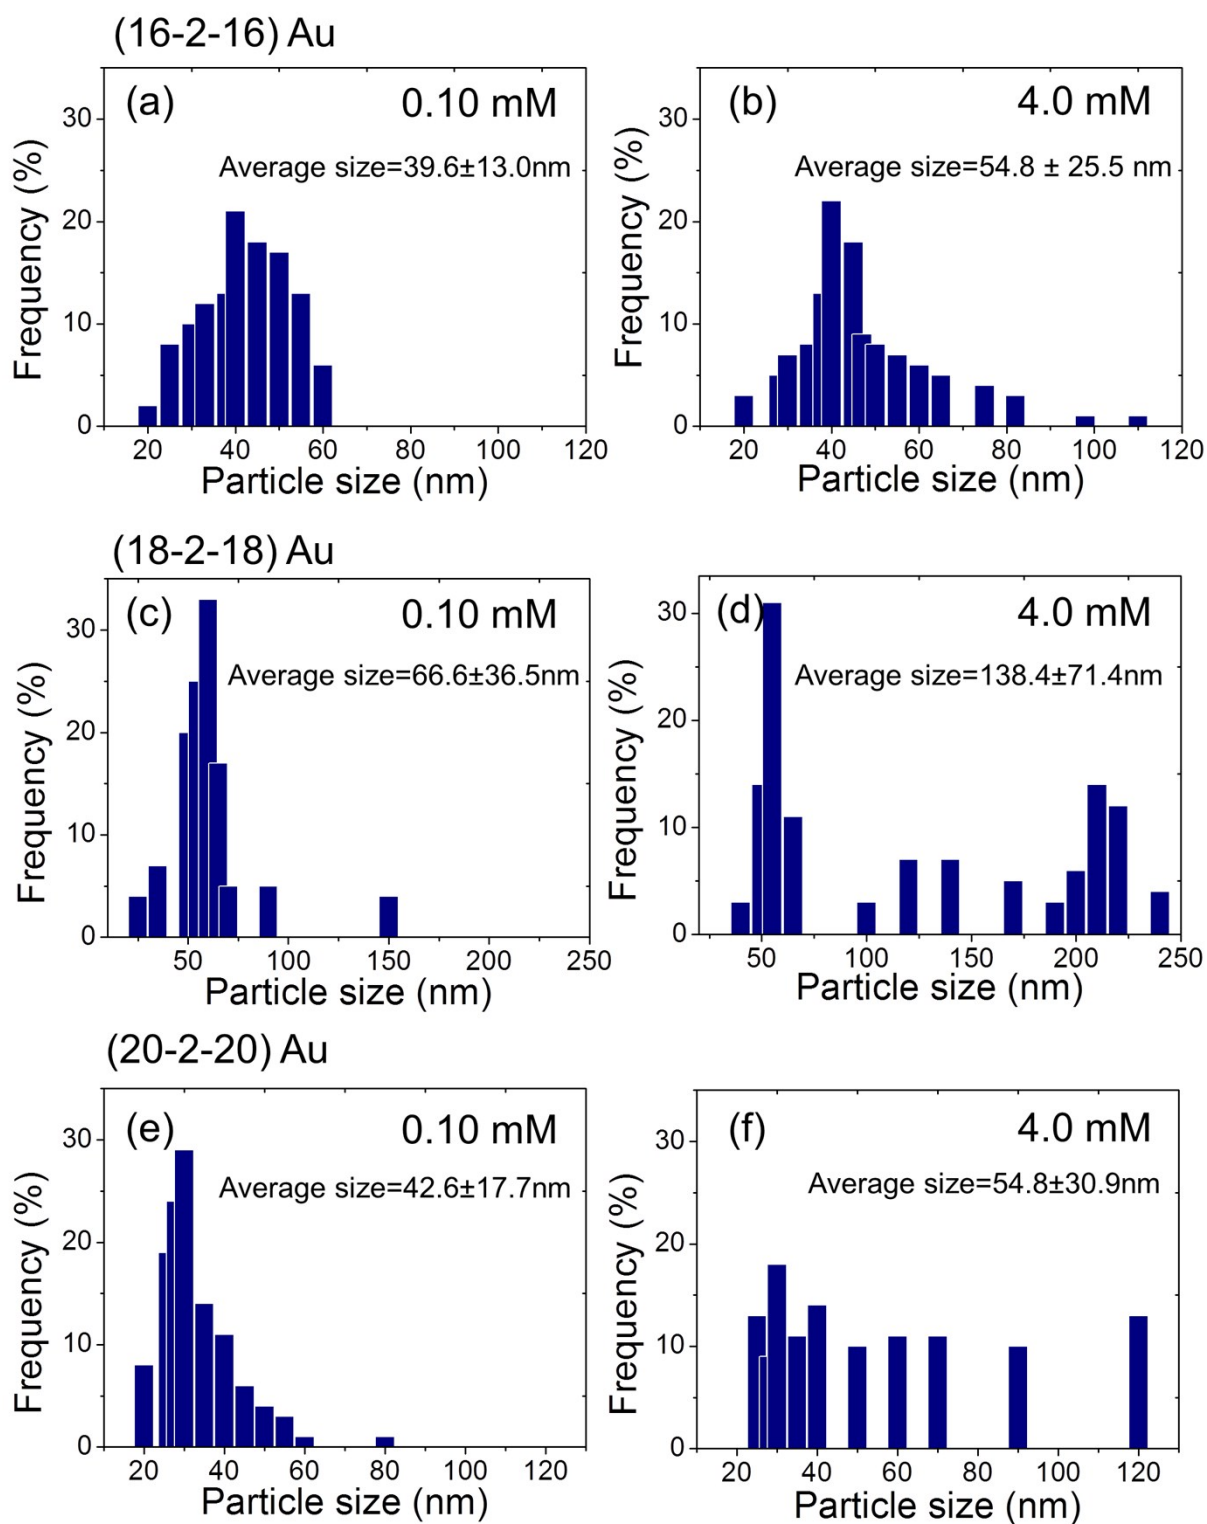

**Fig. S2** Histograms showing size distribution of Au NPs synthesized with 0.10 mM and 4 mM of different TTSs: (a), (b) (16-2-16), (c), (d) (18-2-18) and (e), (f) (20-2-20).

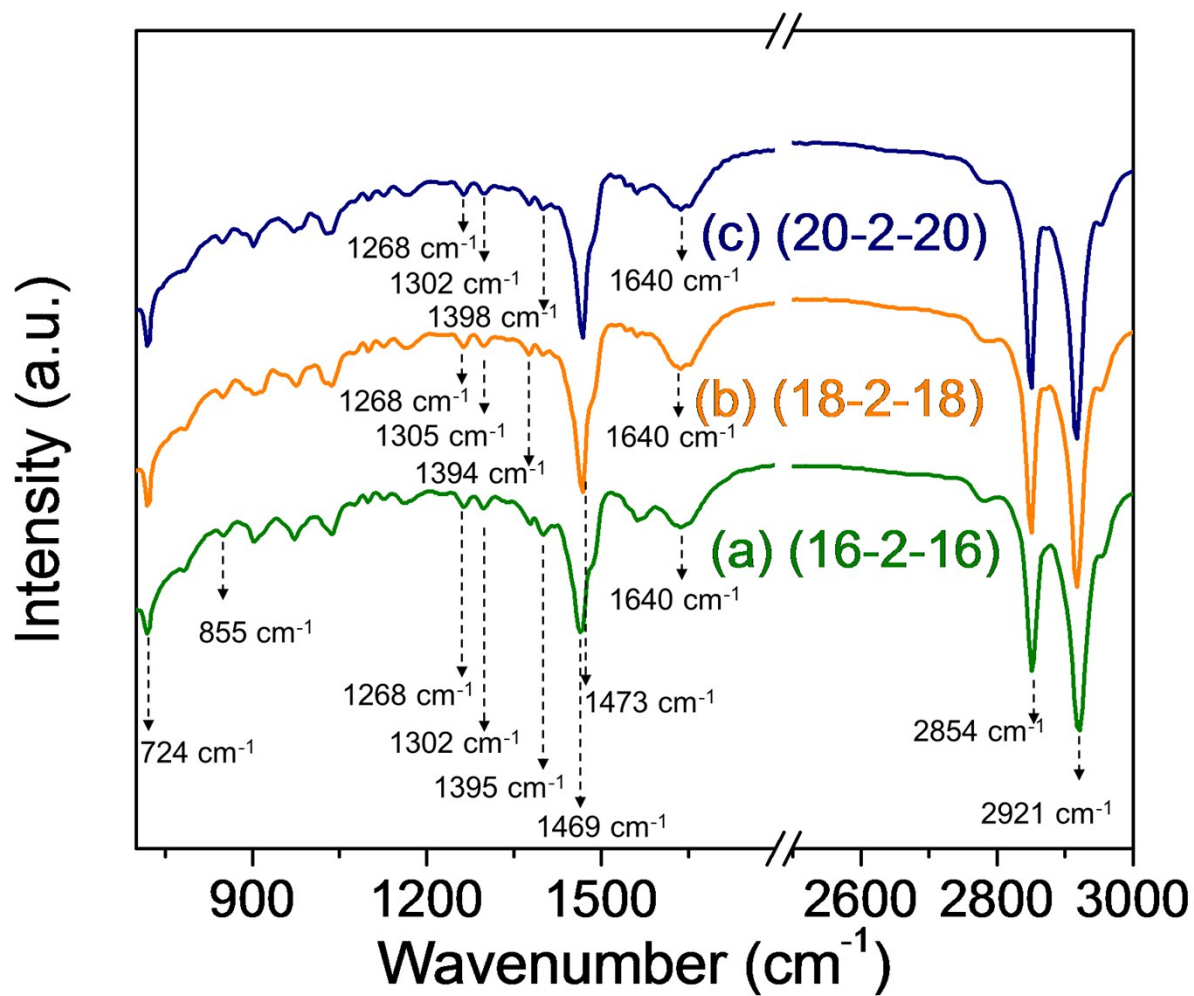

**Fig. S3** FTIR spectra of pure TTSs ( $m = 16, 18, 20$ ).

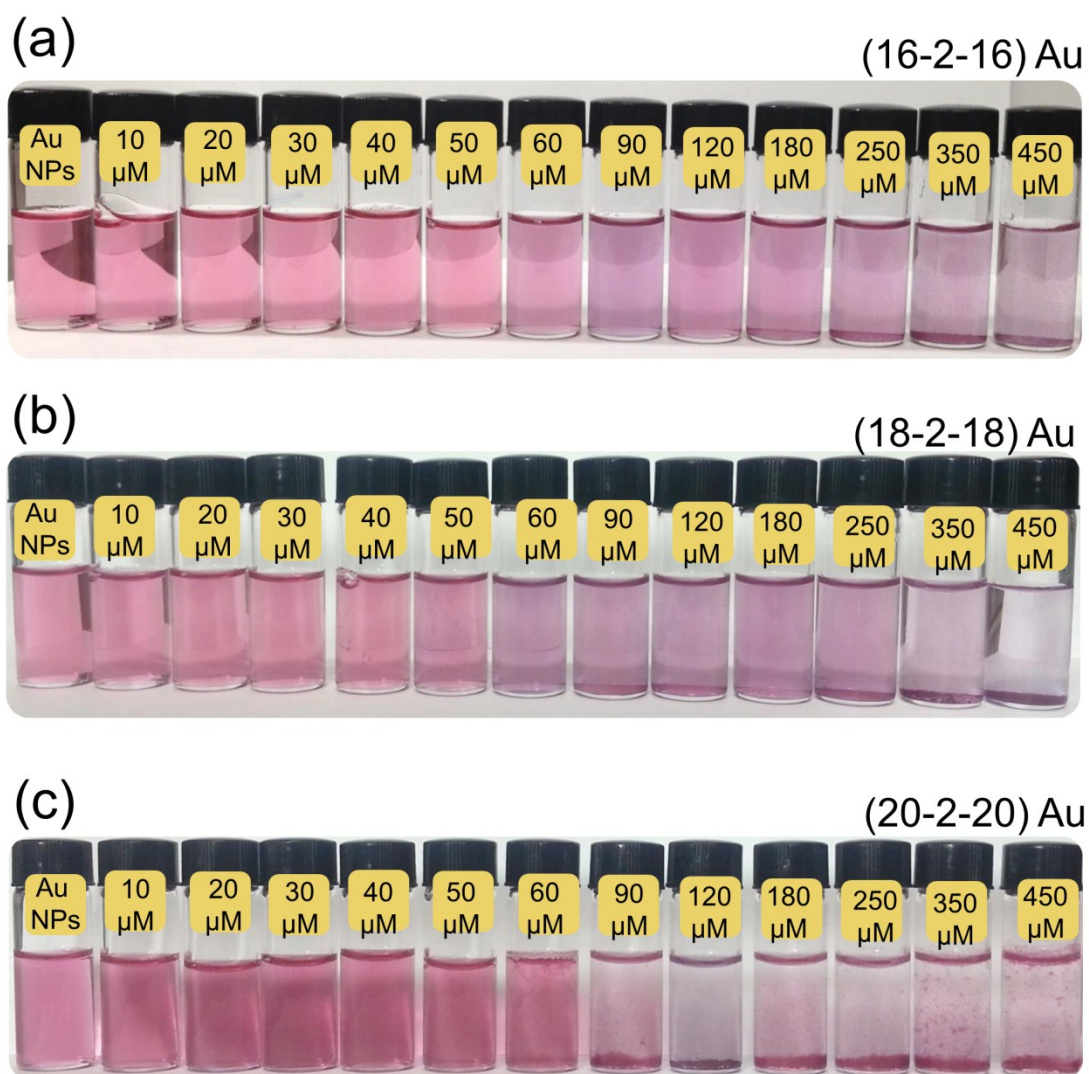

**Fig. S4** Photographs of all three kinds of Au NPs with different concentrations of Hg<sup>2+</sup> range from 0 to 450 μM.

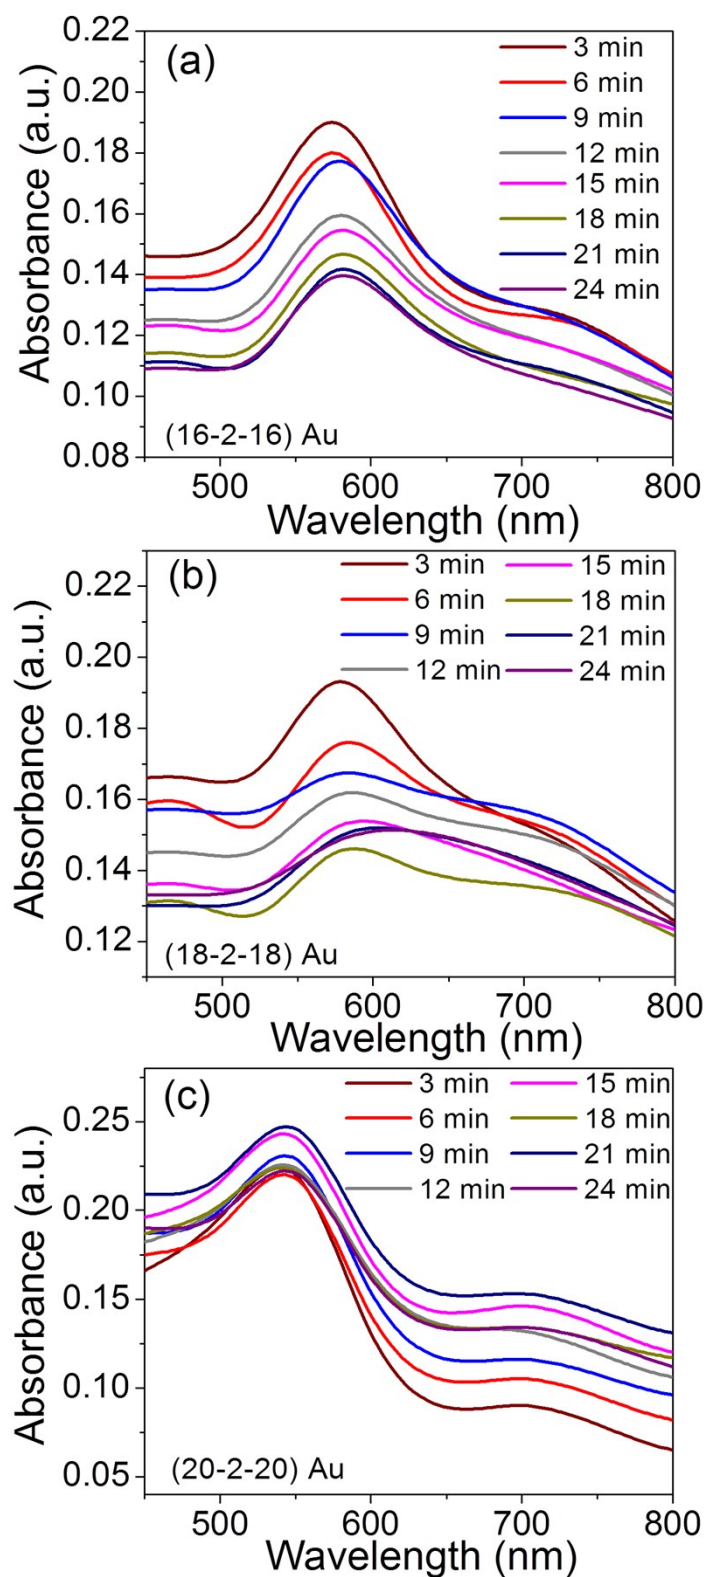

**Fig. S5** Time dependent UV-Vis spectra of Au NPs synthesized with different TTSs in presence of  $\text{Hg}^{2+}$ : (a) (16-2-16) Au NPs, (b) (18-2-18) Au NPs and (c) (20-2-20) Au NPs.
